# Supplementary material for: Synthesis and properties poly(arylene ether sulfone)s with pendant hyper-sulfonic acid
Source: Royal Society of Chemistry journal article supplement (doi:10.1039/c5ra02107c), 2015-01-01
Supplement: c5ra02107c1.pdf [file c5ra02107c1.pdf]

## Supplementary Information

### Synthesis and Properties Poly(arylene ether sulfone)s with Pendant Hyper-Sulfonic Acid

Jinhui Pang, Sinan Feng, Haibo Zhang and Zhenhua Jiang and Guibin Wang\*

*Key Laboratory of Super Engineering Plastic of Ministry of Education, Jilin*

*University; Super Engineering Plastics Engineering Research Center of Ministry of*

*Education, Jilin University No. 2699 Qianjin Street, Changchun 130012, PR China*

\*Corresponding author: Guibin Wang

Tel/Fax: +86-431-85168886

E-mail: wgb@jlu.edu.cn

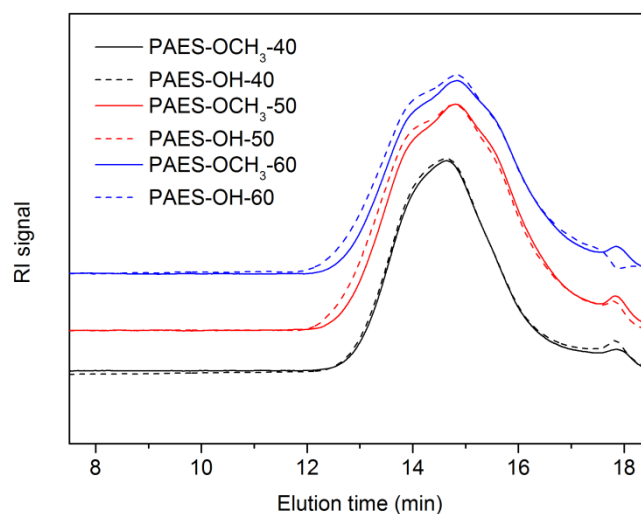

**Figure S1.** GPC profile of polymer precursors.

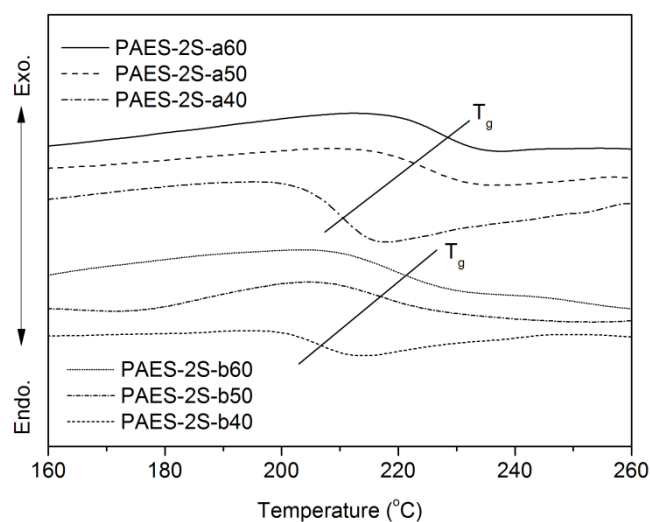

**Figure S2.** DSC curves of disulfonated polymers

**Table S1.** Molecular weight of polymer precursors.

|                           | $M_n$ ( $\times 10$ kDa) | $M_w$ ( $\times 10$ kDa) | PD   |
|---------------------------|--------------------------|--------------------------|------|
| PAES-OCH <sub>3</sub> -40 | 11.8                     | 21.9                     | 1.87 |
| PAES-OH-40                | 12.1                     | 22.8                     | 1.88 |
| PAES-OCH <sub>3</sub> -50 | 9.83                     | 22.3                     | 2.26 |
| PAES-OH-50                | 10.1                     | 25.6                     | 2.53 |
| PAES-OCH <sub>3</sub> -60 | 9.48                     | 21.5                     | 2.27 |
| PAES-OH-60                | 10.2                     | 24.1                     | 2.36 |
